# Supplementary material
Source: Springer Nature journal article supplement (https://www.springermedizin.de/resource/supplementary/12931_2012_1242_MOESM2_ESM.pdf/9425858)
Supplement: MOESM2 [file 9425858]

**A) R0892**

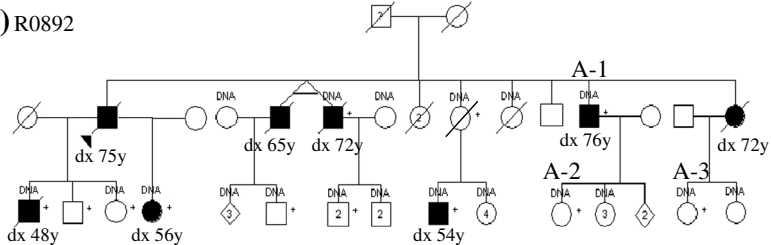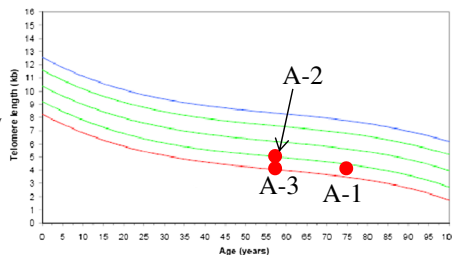

**B) R0851**

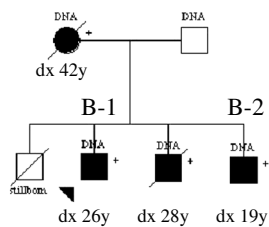

**LYMPHOCYTES**

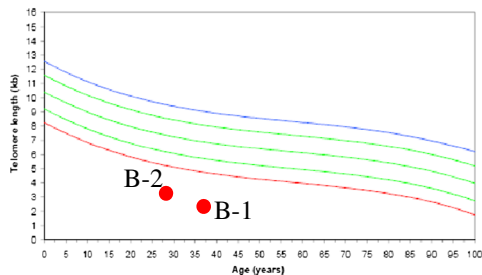

**C) R1254**

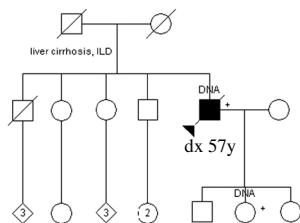

**LEGEND**

- Affected male
- ◊ Deceased female
- + Mutation positive
- ▴ Proband
- 1st percentile
- 10th percentile
- 50th percentile
- 90th percentile
- 99th percentile
